# Supplementary material
Source: HighWire-hosted journal article supplement (http://www.cmaj.ca/highwire/filestream/78641/field_highwire_adjunct_files/2/201748-res-3-at.pdf)
Supplement: 201748-res-3-at.pdf [file 201748-res-3-at.pdf]

| <b>Estimated health care costs (in Canadian dollars) associated with acute care hospital admissions for NIRV and influenza infections*</b>                                                                                                                                                                                                                                                                                                                                                                                                                                                                                                                                                                                                                                                                                                     |                                     |                                |                        |
|------------------------------------------------------------------------------------------------------------------------------------------------------------------------------------------------------------------------------------------------------------------------------------------------------------------------------------------------------------------------------------------------------------------------------------------------------------------------------------------------------------------------------------------------------------------------------------------------------------------------------------------------------------------------------------------------------------------------------------------------------------------------------------------------------------------------------------------------|-------------------------------------|--------------------------------|------------------------|
|                                                                                                                                                                                                                                                                                                                                                                                                                                                                                                                                                                                                                                                                                                                                                                                                                                                | <b>Influenza<br/><i>n</i> = 831</b> | <b>NIRV<br/><i>n</i> = 987</b> | <b><i>p</i> value†</b> |
| ICU cases‡                                                                                                                                                                                                                                                                                                                                                                                                                                                                                                                                                                                                                                                                                                                                                                                                                                     |                                     |                                |                        |
| Median (IQR)                                                                                                                                                                                                                                                                                                                                                                                                                                                                                                                                                                                                                                                                                                                                                                                                                                   | \$30 000 (\$20 000–\$59 000)        | \$29 000 (\$16 000–\$55 000)   | 0.660                  |
| Mean ± SD                                                                                                                                                                                                                                                                                                                                                                                                                                                                                                                                                                                                                                                                                                                                                                                                                                      | \$54 000 ± \$77 000                 | \$51 000 ± \$67 000            |                        |
| Non-ICU ward cases‡                                                                                                                                                                                                                                                                                                                                                                                                                                                                                                                                                                                                                                                                                                                                                                                                                            |                                     |                                |                        |
| Median (IQR)                                                                                                                                                                                                                                                                                                                                                                                                                                                                                                                                                                                                                                                                                                                                                                                                                                   | \$5000 (\$2000–\$8000)              | \$5000 (\$2000–\$10 000)       | 0.134                  |
| Mean ± SD                                                                                                                                                                                                                                                                                                                                                                                                                                                                                                                                                                                                                                                                                                                                                                                                                                      | \$8000 ± \$18 000                   | \$9000 ± \$14 000              |                        |
| All cases‡                                                                                                                                                                                                                                                                                                                                                                                                                                                                                                                                                                                                                                                                                                                                                                                                                                     |                                     |                                |                        |
| Median (IQR)                                                                                                                                                                                                                                                                                                                                                                                                                                                                                                                                                                                                                                                                                                                                                                                                                                   | \$6000 (\$2000–\$13 000)            | \$6000 (\$2000–\$16 000)       | 0.053                  |
| Mean ± SD                                                                                                                                                                                                                                                                                                                                                                                                                                                                                                                                                                                                                                                                                                                                                                                                                                      | \$15 000 ± \$39 000                 | \$17 000 ± \$35 000            |                        |
| <p>Note: ICU = intensive care unit, IQR = interquartile range, NIRV = noninfluenza respiratory virus, SD = standard deviation.</p> <p>*The median (IQR) cost per admission in each group was calculated based on patients' recorded durations of ICU and/or hospital ward stay. Costs expressed in mean ± SD are provided for reference.</p> <p>†Nonparametric comparisons between NIRV and influenza patients.</p> <p>‡ICU cases include patients who required ICU admission for support during all or part of their hospital stay. Non-ICU ward cases includes patients managed in hospital wards only during their hospital stay. All cases includes both ICU and non-ICU ward cases. Both survivors and non-survivors were included in the analyses; hospital-acquired viral infections and convalescent hospital stays were excluded.</p> |                                     |                                |                        |
